# Supplementary material
Source: PubMed Central journal article supplement (PMC4784869)
Supplement: molh025004.ww_default.pdf [file molh025004.ww_default.pdf]

Appendix. Analysis of the three main cancer patient groups identified in Figure 3 on the basis of GP urgent referral characteristics. Stratified analyses by cancer type and sensitivity analyses with different durations of follow-up, inclusion criteria and regression model specifications.

A. Overall analysis (215,284 patients; 91,620 deaths)

| Group*         | Patients | %  | Deaths | HR     | 95% CI    |
|----------------|----------|----|--------|--------|-----------|
| 1              | 34,758   | 16 | 14,355 | 0.96   | 0.94 0.98 |
| 2              | 101,110  | 47 | 42,621 | 1.00   |           |
| 3              | 79,416   | 37 | 34,644 | 1.07   | 1.05 1.08 |
| <i>p-trend</i> |          |    |        | <0.001 |           |

B. Restricted to colorectal cancer

| Group          | Patients | %  | Deaths | HR    | 95% CI    |
|----------------|----------|----|--------|-------|-----------|
| 1              | 3,865    | 16 | 1,670  | 0.97  | 0.92 1.02 |
| 2              | 11,611   | 47 | 5,175  | 1.00  |           |
| 3              | 9,160    | 37 | 4,145  | 1.03  | 0.99 1.08 |
| <i>p-trend</i> |          |    |        | 0.017 |           |

C. Restricted to lung cancer

| Group          | Patients | %  | Deaths | HR     | 95% CI    |
|----------------|----------|----|--------|--------|-----------|
| 1              | 3,596    | 16 | 3,107  | 0.96   | 0.93 1.00 |
| 2              | 10,411   | 46 | 9,086  | 1.00   |           |
| 3              | 8,779    | 39 | 7,743  | 1.05   | 1.02 1.08 |
| <i>p-trend</i> |          |    |        | <0.001 |           |

D. Restricted to female breast cancer

| Group          | Patients | %  | Deaths | HR    | 95% CI    |
|----------------|----------|----|--------|-------|-----------|
| 1              | 5,108    | 15 | 997    | 1.05  | 0.98 1.13 |
| 2              | 15,964   | 48 | 2,872  | 1.00  |           |
| 3              | 12,497   | 37 | 2,172  | 1.03  | 0.97 1.09 |
| <i>p-trend</i> |          |    |        | 0.842 |           |

E. Restricted to prostate cancer

| Group          | Patients | %  | Deaths | HR    | 95% CI    |
|----------------|----------|----|--------|-------|-----------|
| 1              | 4,325    | 17 | 984    | 0.95  | 0.88 1.02 |
| 2              | 12,033   | 47 | 2,826  | 1.00  |           |
| 3              | 9,297    | 36 | 2,239  | 1.07  | 1.01 1.13 |
| <i>p-trend</i> |          |    |        | 0.001 |           |

F. Restricted to cancers other than colorectal, lung, breast, prostate.

| Group          | Patients | %  | Deaths | HR     | 95% CI    |
|----------------|----------|----|--------|--------|-----------|
| 1              | 17,827   | 16 | 7,581  | 0.94   | 0.92 0.97 |
| 2              | 50,976   | 47 | 22,632 | 1.00   |           |
| 3              | 39,601   | 37 | 18,324 | 1.09   | 1.07 1.11 |
| <i>p-trend</i> |          |    |        | <0.001 |           |

G. All cancers excluding female breast cancer

| Group          | Patients | %  | Deaths | HR     | 95% CI    |
|----------------|----------|----|--------|--------|-----------|
| 1              | 29,650   | 16 | 13,358 | 0.95   | 0.93 0.97 |
| 2              | 85,146   | 47 | 39,749 | 1.00   |           |
| 3              | 66,919   | 37 | 32,472 | 1.07   | 1.05 1.09 |
| <i>p-trend</i> |          |    |        | <0.001 |           |

H. Follow-up time limited to 0-1 year after diagnosis

| Group          | Patients | %  | Deaths | HR     | 95% CI    |
|----------------|----------|----|--------|--------|-----------|
| 1              | 34,758   | 16 | 7,842  | 0.94   | 0.92 0.97 |
| 2              | 101,110  | 47 | 23,764 | 1.00   |           |
| 3              | 79,416   | 37 | 20,000 | 1.09   | 1.07 1.11 |
| <i>p-trend</i> |          |    |        | <0.001 |           |

I. Follow-up time limited to 0-2 year after diagnosis

| Group          | Patients | %  | Deaths | HR     | 95% CI    |
|----------------|----------|----|--------|--------|-----------|
| 1              | 34,758   | 16 | 11,020 | 0.96   | 0.94 0.98 |
| 2              | 101,110  | 47 | 32,867 | 1.00   |           |
| 3              | 79,416   | 37 | 27,146 | 1.08   | 1.06 1.09 |
| <i>p-trend</i> |          |    |        | <0.001 |           |

J. Also adjusted for the patient's socioeconomic status\*\*

| Group          | Patients | %  | Deaths | HR     | 95% CI    |
|----------------|----------|----|--------|--------|-----------|
| 1              | 34,758   | 16 | 14,355 | 0.96   | 0.94 0.98 |
| 2              | 101,110  | 47 | 42,621 | 1.00   |           |
| 3              | 79,416   | 37 | 34,644 | 1.06   | 1.05 1.08 |
| <i>p-trend</i> |          |    |        | <0.001 |           |

K. Diagnosis and length of follow-up consistent with cancer register

| Group          | Patients | %  | Deaths | HR     | 95% CI    |
|----------------|----------|----|--------|--------|-----------|
| 1              | 27,112   | 16 | 10,913 | 0.95   | 0.93 0.98 |
| 2              | 78,371   | 47 | 32,258 | 1.00   |           |
| 3              | 60,664   | 37 | 25,795 | 1.06   | 1.05 1.08 |
| <i>p-trend</i> |          |    |        | <0.001 |           |

L. Not adjusted for type of cancer

| Group          | Patients | %  | Deaths | HR     | 95% CI    |
|----------------|----------|----|--------|--------|-----------|
| 1              | 34,758   | 16 | 14,355 | 0.97   | 0.95 0.99 |
| 2              | 101,110  | 47 | 42,621 | 1.00   |           |
| 3              | 79,416   | 37 | 34,644 | 1.08   | 1.06 1.09 |
| <i>p-trend</i> |          |    |        | <0.001 |           |

M. Also adjusted for GP population age and sex distribution\*\*\*

| Group          | Patients | %  | Deaths | HR     | 95% CI    |
|----------------|----------|----|--------|--------|-----------|
| 1              | 34,758   | 16 | 14,355 | 0.97   | 0.95 0.99 |
| 2              | 101,110  | 47 | 42,621 | 1.00   |           |
| 3              | 79,416   | 37 | 34,644 | 1.05   | 1.04 1.07 |
| <i>p-trend</i> |          |    |        | <0.001 |           |

N. Shared frailty model for prostate cancer (GP as random effect)

| Group          | Patients | %  | Deaths | HR    | 95% CI    |
|----------------|----------|----|--------|-------|-----------|
| 1              | 4,325    | 17 | 984    | 0.95  | 0.88 1.02 |
| 2              | 12,033   | 47 | 2,826  | 1.00  |           |
| 3              | 9,297    | 36 | 2,239  | 1.07  | 1.01 1.13 |
| <i>p-trend</i> |          |    |        | 0.001 |           |

\*Group 1: High referral ratio and high detection rate.  
 Group 2: All other combinations than group 1 and group 3.  
 Group 3: Low or low/intermediate referral ratio and detection rate  
 Hazard ratios adjusted for age, sex and cancer type.

\*\*From J: Most vs. least deprived quintile:  
 HR: 1.34 (1.32-1.37); p-trend over quintiles <0.001  
 141 records with missing value for SES included as a separate category

\*\*\*From M: Effects of GP population characteristics:  
 HR: 0.88 (0.86-0.90) for highest vs. lowest tertile of median age  
 HR: 1.13 (1.08-1.17) per 10 percentage point increase in male proportion
